# Supplementary material
Source: PubMed Central journal article supplement (PMC406463)

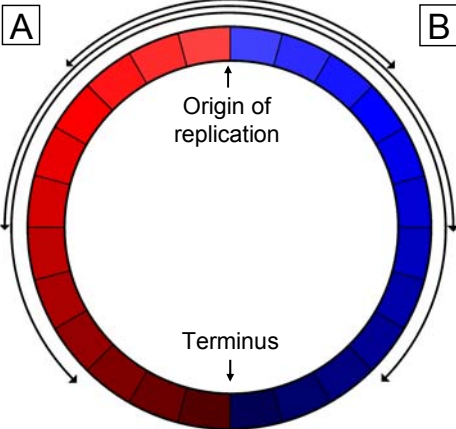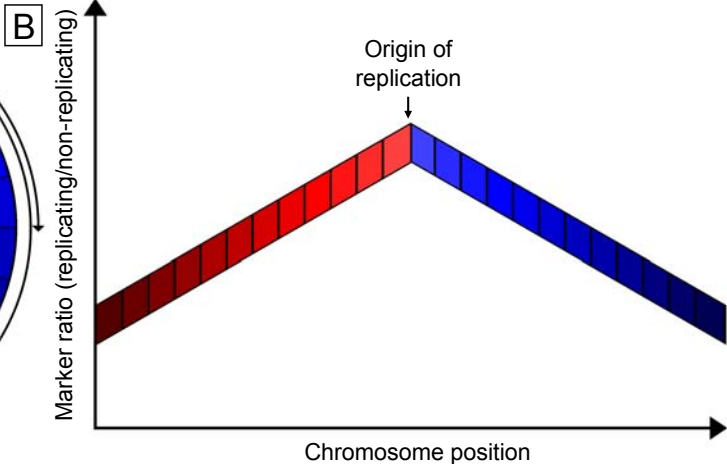

Supplement: pnas_101_18_7046__1.pdf [file pnas_101_18_7046__1.pdf]

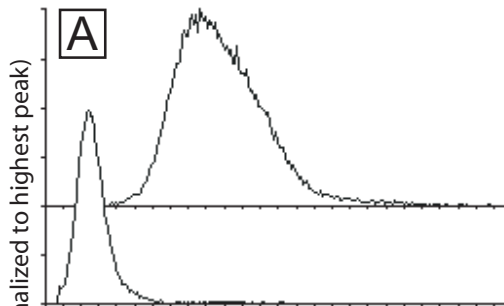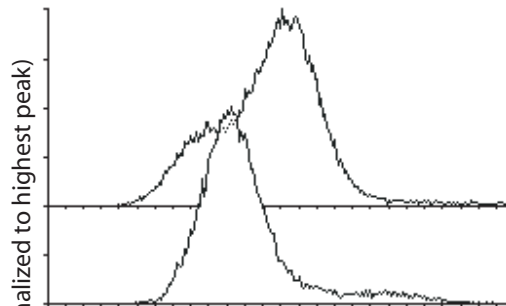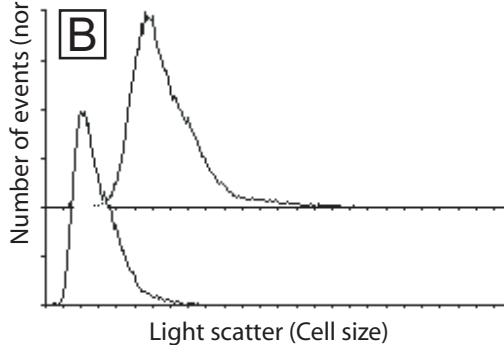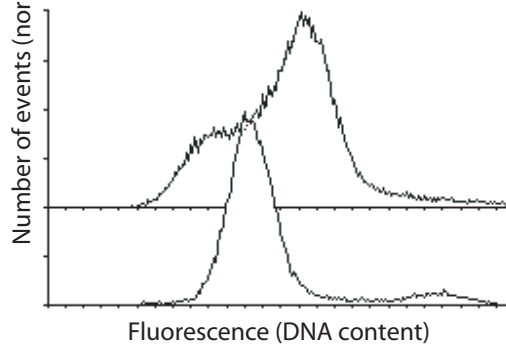

Supplement: pnas_101_18_7046__2.pdf [file pnas_101_18_7046__2.pdf]
